# Supplementary material
Source: PubMed Central journal article supplement (PMC8243257)

## Supplemental Online Content

Montgomery J, Ryan M, Engler R, et al. Myocarditis following immunization with mRNA COVID-19 vaccines in members of the US military. *JAMA Cardiol*. Published online June 29, 2021. doi:10.1001/jamacardio.2021.2833

**eFigure.** Cardiac magnetic resonance image for a patient with myocarditis

This supplementary material has been provided by the authors to give readers additional information about their work.

**eFigure.** Cardiac magnetic resonance image for a patient with myocarditis

Cardiac magnetic resonance image demonstrating increased signal on the T2 sequence in the inferolateral wall of the left ventricle, consistent with the diagnosis of myocarditis.

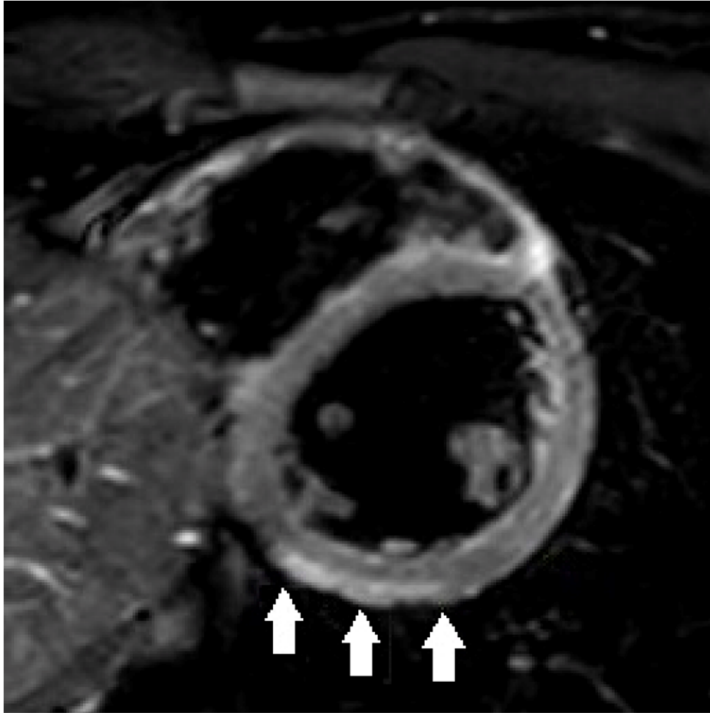

Supplement: jamacardiol-e212833-s001.pdf [file jamacardiol-e212833-s001.pdf]
